# Supplementary material for: Dietary intake of adults with and without diabetes: results from NHANES 2013–2016
Source: PubMed Central journal article supplement — BMJ Open Diabetes Res Care. 2020 Oct 23;8(1):e001681. doi: 10.1136/bmjdrc-2020-001681 (PMC7590352; doi:10.1136/bmjdrc-2020-001681), 2020-10-23
Supplement: bmjdrc-2020-001681supp001.pdf [file bmjdrc-2020-001681supp001.pdf]

## Supplement.

Supplemental Table 1. Dietary intake by diabetes status in non-pregnant adults 20+ years old from NHANES 2013-2016 crude and adjusted.\*

|                               | Crude             |                   |              | Model 1†          |                   |              | Model 2‡          |                   |              |
|-------------------------------|-------------------|-------------------|--------------|-------------------|-------------------|--------------|-------------------|-------------------|--------------|
|                               | No diabetes       | Diabetes          | P-Values     | No diabetes       | Diabetes          | P-value      | No diabetes       | Diabetes          | P-value      |
| <b>N (unweighted)</b>         | 3352              | 947               |              | 3352              | 947               |              | 3284              | 884               |              |
| <b>Absolute intake</b>        |                   |                   |              |                   |                   |              |                   |                   |              |
| Energy (kcal/d)               | 2178 (2133, 2223) | 2018 (1932, 2105) | <b>0.005</b> | 2195 (2153, 2236) | 2115 (2027, 2204) | 0.131        | 2152 (2111, 2193) | 2164 (2058, 2269) | 0.848        |
| Protein (g/d)                 | 85 (83, 87)       | 80 (77, 83)       | <b>0.015</b> | 86 (84, 88)       | 84 (81, 88)       | 0.532        | 84 (82, 86)       | 86 (81, 90)       | 0.452        |
| Total carbohydrates (g/d)     | 254 (248, 260)    | 233 (220, 246)    | <b>0.011</b> | 256 (250, 262)    | 244 (231, 258)    | 0.138        | 252 (246, 257)    | 248 (233, 263)    | 0.701        |
| Sugar (g/d)                   | 110 (106, 114)    | 98 (89, 107)      | <b>0.031</b> | 111 (107, 115)    | 103 (93, 114)     | 0.200        | 108 (105, 112)    | 108 (96, 120)     | 0.992        |
| Fiber (g/d)                   | 17 (17, 18)       | 16 (15, 17)       | 0.079        | 17 (17, 18)       | 16 (15, 17)       | <b>0.025</b> | 17 (17, 18)       | 16 (15, 17)       | <b>0.011</b> |
| Fat (g/d)                     | 86 (84, 88)       | 82 (78, 86)       | 0.070        | 86 (84, 88)       | 85 (81, 89)       | 0.457        | 85 (83, 87)       | 87 (82, 91)       | 0.458        |
| Saturated fat (g/d)           | 28 (27, 29)       | 27 (25, 28)       | 0.053        | 28 (27, 29)       | 28 (27, 29)       | 0.688        | 28 (27, 28)       | 29 (27, 30)       | 0.294        |
| Monounsaturated fat (g/d)     | 30 (29, 31)       | 29 (27, 30)       | 0.080        | 30 (29, 31)       | 29 (28, 31)       | 0.283        | 30 (29, 31)       | 30 (28, 32)       | 0.646        |
| Polyunsaturated fat (g/d)     | 20 (19, 20)       | 19 (18, 20)       | 0.223        | 20 (19, 20)       | 19 (18, 21)       | 0.509        | 20 (19, 20)       | 20 (18, 21)       | 0.756        |
| Cholesterol (mg/d)            | 297 (286, 309)    | 301 (279, 323)    | 0.784        | 300 (287, 312)    | 308 (283, 332)    | 0.538        | 296 (284, 308)    | 311 (283, 339)    | 0.319        |
| Calcium (mg/d)                | 974 (937, 1011)   | 938 (869, 1007)   | 0.275        | 980 (950, 1011)   | 1003 (931, 1075)  | 0.503        | 957 (926, 988)    | 1024 (943, 1105)  | 0.113        |
| Potassium (mg/d)              | 2646 (2580, 2711) | 2551 (2446, 2655) | 0.098        | 2640 (2576, 2704) | 2499 (2382, 2616) | <b>0.025</b> | 2638 (2576, 2700) | 2582 (2455, 2709) | 0.426        |
| Magnesium (mg/d)              | 307 (299, 316)    | 283 (271, 294)    | <b>0.001</b> | 308 (299, 316)    | 281 (267, 296)    | <b>0.003</b> | 305 (297, 313)    | 293 (279, 307)    | 0.142        |
| Sodium (mg/d)                 | 3617 (3532, 3703) | 3503 (3339, 3666) | 0.218        | 3652 (3569, 3735) | 3736 (3565, 3907) | 0.371        | 3572 (3496, 3648) | 3716 (3516, 3916) | 0.188        |
| <b>Energy adjusted intake</b> |                   |                   |              |                   |                   |              |                   |                   |              |
| Protein (% kcal)              | 16.0 (15.7, 16.4) | 16.2 (15.7, 16.8) | 0.514        | 16.0 (15.7, 16.4) | 16.3 (15.7, 16.9) | 0.543        | 16.1 (15.7, 16.4) | 16.0 (15.4, 16.7) | 0.872        |
| Total carbohydrates (% kcal)  | 47.1 (46.5, 47.6) | 46.8 (45.9, 47.7) | 0.625        | 47.1 (46.5, 47.7) | 46.9 (45.9, 47.9) | 0.699        | 47.1 (46.6, 47.7) | 46.6 (45.4, 47.8) | 0.397        |
| Sugar (% kcal)                | 20.4 (19.8, 21.0) | 19.4 (18.2, 20.6) | 0.137        | 20.4 (19.8, 21.0) | 19.5 (18.2, 20.9) | 0.236        | 20.3 (19.8, 20.7) | 20.2 (18.7, 21.8) | 0.976        |
| Fiber (g / 2000 kcal)         | 16 (16, 17)       | 17 (16, 18)       | 0.160        | 16 (16, 17)       | 16 (15, 17)       | 0.666        | 17 (16, 17)       | 16 (15, 17)       | 0.086        |
| Fat (% kcal)                  | 35.0 (34.7, 35.4) | 35.8 (34.9, 36.7) | 0.079        | 34.9 (34.6, 35.3) | 35.3 (34.5, 36.2) | 0.363        | 35.0 (34.7, 35.4) | 35.4 (34.2, 36.5) | 0.595        |
| Saturated fat (% kcal)        | 11.4 (11.2, 11.6) | 11.6 (11.3, 12.0) | 0.142        | 11.4 (11.2, 11.5) | 11.6 (11.3, 12.0) | 0.150        | 11.4 (11.2, 11.5) | 11.6 (11.1, 12.1) | 0.347        |
| Monounsaturated fat (% kcal)  | 12.3 (12.1, 12.4) | 12.6 (12.2, 12.9) | 0.105        | 12.2 (12.1, 12.4) | 12.3 (11.9, 12.6) | 0.946        | 12.3 (12.2, 12.5) | 12.3 (11.8, 12.7) | 0.871        |
| Polyunsaturated fat (% kcal)  | 8.1 (7.9, 8.3)    | 8.3 (8.0, 8.6)    | 0.293        | 8.1 (7.9, 8.2)    | 8.1 (7.7, 8.5)    | 0.860        | 8.1 (7.9, 8.3)    | 8.1 (7.7, 8.6)    | 0.943        |
| Cholesterol (mg / 2000 kcal)  | 280 (270, 291)    | 305 (285, 325)    | <b>0.035</b> | 280 (270, 290)    | 296 (274, 318)    | 0.196        | 283 (272, 294)    | 289 (268, 310)    | 0.621        |
| Calcium (mg / 2000 kcal)      | 922 (894, 951)    | 969 (913, 1025)   | 0.122        | 921 (896, 946)    | 988 (930, 1045)   | <b>0.033</b> | 920 (894, 946)    | 981 (927, 1034)   | <b>0.041</b> |
| Potassium (mg / 2000 kcal)    | 2539 (2483, 2594) | 2687 (2592, 2783) | <b>0.015</b> | 2513 (2459, 2567) | 2513 (2412, 2614) | 0.994        | 296 (289, 303)    | 287 (276, 298)    | 0.221        |
| Magnesium (mg / 2000 kcal)    | 294 (286, 302)    | 296 (285, 308)    | 0.739        | 292 (285, 300)    | 284 (272, 295)    | 0.266        | 2567 (2515, 2619) | 2524 (2422, 2627) | 0.464        |
| Sodium (mg / 2000 kcal)       | 3420 (3351, 3488) | 3548 (3429, 3667) | 0.102        | 3425 (3359, 3492) | 3607 (3475, 3740) | <b>0.026</b> | 3425 (3360, 3490) | 3480 (3352, 3608) | 0.485        |

\*Values are means (95% confidence intervals), †Adjusted for age, race, and sex, Model 1 + education, duration of diabetes, and access to healthcare

**Supplemental Table 2. Absolute and energy-adjusted dietary intake by glycemic level in non-pregnant adults 20+ years old from NHANES 2013-2016 (not adjusted for age, race, or sex).\***

|                                                | No diabetes       | Prediabetes            | Diabetes          |                        |                   | P-value (ANOVA) |
|------------------------------------------------|-------------------|------------------------|-------------------|------------------------|-------------------|-----------------|
|                                                | HbA1c < 5.7%      | HbA1c ≥ 5.7 and < 6.5% | HbA1c < 6.5%      | HbA1c ≥ 6.5 and < 9.0% | HbA1c ≥ 9.0%      |                 |
| <b>N (unweighted)</b>                          | 2422              | 928                    | 417               | 405                    | 125               |                 |
| <b>Absolute intake</b>                         |                   |                        |                   |                        |                   |                 |
| Energy (kcal/d)                                | 2198 (2146, 2250) | 2107 (2029, 2185)      | 1985 (1861, 2108) | 2047 (1883, 2211)      | 2053 (1866, 2240) | 0.063           |
| Protein (g/d)                                  | 86 (83, 88)       | 81 (78, 84)            | 81 (75, 87)       | 78 (73, 83)            | 84 (76, 93)       | 0.072           |
| Total carbohydrates (g/d)                      | 255 (248, 262)    | 252 (242, 261)         | 224 (209, 239)    | 243 (220, 265)         | 234 (205, 263)    | 0.065           |
| Sugar (g/d)                                    | 110 (105, 115)    | 111 (104, 118)         | 96 (88, 105)      | 99 (85, 113)           | 100 (79, 121)     | 0.202           |
| Fiber (g/d)                                    | 17 (17, 18)       | 17 (16, 17)            | 16 (15, 17)       | 17 (15, 18)            | 16 (13, 18)       | <b>0.045</b>    |
| Fat (g/d)                                      | 87 (84, 89)       | 83 (79, 88)            | 80 (75, 85)       | 83 (76, 90)            | 87 (78, 95)       | 0.208           |
| Saturated fat (g/d)                            | 28 (27, 29)       | 27 (26, 29)            | 27 (25, 28)       | 27 (24, 29)            | 28 (24, 31)       | 0.390           |
| Monounsaturated fat (g/d)                      | 30 (29, 31)       | 29 (28, 31)            | 28 (26, 30)       | 29 (27, 31)            | 31 (28, 34)       | 0.276           |
| Polyunsaturated fat (g/d)                      | 20 (19, 21)       | 19 (18, 20)            | 18 (16, 19)       | 20 (18, 22)            | 20 (18, 22)       | 0.056           |
| Cholesterol (mg/d)                             | 295 (281, 310)    | 305 (282, 328)         | 295 (262, 328)    | 301 (274, 327)         | 326 (276, 375)    | 0.788           |
| Calcium (mg/d)                                 | 994 (951, 1037)   | 902 (853, 951)         | 979 (870, 1088)   | 911 (825, 998)         | 867 (750, 984)    | <b>0.030</b>    |
| Potassium (mg/d)                               | 2662 (2586, 2738) | 2585 (2473, 2696)      | 2526 (2385, 2668) | 2580 (2383, 2778)      | 2540 (2301, 2779) | 0.261           |
| Magnesium (mg/d)                               | 313 (303, 323)    | 287 (275, 300)         | 281 (265, 297)    | 287 (266, 309)         | 274 (244, 303)    | <b>0.001</b>    |
| Sodium (mg/d)                                  | 3643 (3540, 3746) | 3522 (3373, 3670)      | 3417 (3179, 3654) | 3524 (3251, 3797)      | 3777 (3325, 4230) | 0.366           |
| <b>Energy adjusted intake</b>                  |                   |                        |                   |                        |                   |                 |
| Protein (% kcal)                               | 16.1 (15.6, 16.5) | 15.9 (15.4, 16.4)      | 16.2 (15.4, 17.0) | 16.0 (15.4, 16.5)      | 17.3 (16.0, 18.6) | 0.383           |
| Total carbohydrates (% kcal)                   | 46.8 (46.1, 47.5) | 47.9 (46.8, 48.9)      | 46.0 (45.0, 47.1) | 48.0 (46.6, 49.3)      | 45.7 (43.4, 48.1) | 0.117           |
| Sugar (% kcal)                                 | 20.2 (19.5, 21.0) | 21.0 (20.0, 21.9)      | 20.0 (18.9, 21.1) | 18.8 (17.3, 20.3)      | 19.0 (16.0, 22.0) | 0.166           |
| Fiber (g / 2000 kcal)                          | 16 (16, 17)       | 16 (16, 17)            | 17 (16, 18)       | 17 (16, 18)            | 16 (14, 19)       | 0.383           |
| Fat (% kcal)                                   | 35.0 (34.5, 35.4) | 35.3 (34.5, 36.2)      | 35.5 (34.4, 36.6) | 35.9 (34.6, 37.1)      | 36.8 (34.8, 38.8) | 0.463           |
| Saturated fat (% kcal)                         | 11.4 (11.1, 11.6) | 11.5 (11.1, 12.0)      | 11.7 (11.2, 12.2) | 11.5 (11.0, 12.1)      | 11.7 (10.9, 12.5) | 0.386           |
| Monounsaturated fat (% kcal)                   | 12.3 (12.1, 12.4) | 12.3 (12.0, 12.7)      | 12.4 (11.9, 12.9) | 12.5 (12.0, 13.1)      | 13.3 (12.4, 14.2) | 0.340           |
| Polyunsaturated fat (% kcal)                   | 8.1 (7.9, 8.3)    | 8.1 (7.9, 8.4)         | 8.0 (7.6, 8.5)    | 8.6 (8.1, 9.0)         | 8.3 (7.7, 9.0)    | 0.339           |
| Cholesterol (mg / 2000 kcal)                   | 276 (263, 288)    | 298 (280, 315)         | 303 (276, 329)    | 304 (275, 333)         | 319 (283, 356)    | 0.154           |
| Calcium (mg / 2000 kcal)                       | 935 (900, 969)    | 879 (843, 914)         | 1006 (915, 1096)  | 954 (872, 1036)        | 870 (795, 945)    | <b>0.032</b>    |
| Potassium (mg / 2000 kcal)                     | 2525 (2469, 2580) | 2589 (2503, 2675)      | 2702 (2578, 2825) | 2692 (2544, 2839)      | 2612 (2450, 2774) | 0.066           |
| Magnesium (mg / 2000 kcal)                     | 296 (288, 304)    | 286 (276, 295)         | 298 (283, 313)    | 299 (284, 313)         | 282 (254, 310)    | 0.114           |
| Sodium (mg / 2000 kcal)                        | 3418 (3341, 3494) | 3425 (3308, 3541)      | 3459 (3308, 3610) | 3601 (3423, 3779)      | 3722 (3444, 3999) | 0.285           |
| <b>Overall HEI-2015 Diet Score<sup>†</sup></b> | 44.6 (43.7, 45.6) | 41.5 (40.2, 42.8)      | 42.1 (40.4, 43.8) | 42.4 (40.4, 44.3)      | 39 (37.0, 41.1)   | <b>0.001</b>    |

\*Values are means (95% confidence intervals) †Range = 0 (worst) to 100 (best)

**Supplemental Table 3. Absolute dietary intake by glycemic level in non-pregnant adults 20+ years old from NHANES 2013-2016 adjusted for age, race, and sex.\***

|                           | No diabetes       | Prediabetes            | Diabetes          |                        |                   | P-value<br>(ANOVA) |
|---------------------------|-------------------|------------------------|-------------------|------------------------|-------------------|--------------------|
|                           | HbA1c < 5.7%      | HbA1c ≥ 5.7 and < 6.5% | HbA1c < 6.5%      | HbA1c ≥ 6.5 and < 9.0% | HbA1c ≥ 9.0%      |                    |
| <b>N (unweighted)</b>     | 2422              | 928                    | 417               | 405                    | 125               |                    |
| Energy (kcal/d)           | 2189 (2142, 2235) | 2216 (2132, 2300)      | 2095 (1978, 2213) | 2151 (1997, 2305)      | 2094 (1918, 2269) | 0.556              |
| Protein (g/d)             | 86 (83, 88)       | 85 (82, 89)            | 86 (80, 91)       | 83 (78, 88)            | 86 (78, 93)       | 0.810              |
| Total carbohydrates (g/d) | 254 (248, 260)    | 265 (254, 276)         | 238 (223, 253)    | 256 (235, 278)         | 239 (211, 267)    | 0.143              |
| Sugar (g/d)               | 109 (105, 114)    | 118 (110, 126)         | 103 (94, 112)     | 106 (91, 120)          | 105 (83, 126)     | 0.231              |
| Fiber (g/d)               | 17 (17, 18)       | 16 (16, 17)            | 16 (14, 17)       | 16 (15, 18)            | 15 (13, 17)       | <b>0.003</b>       |
| Fat (g/d)                 | 86 (84, 88)       | 87 (83, 91)            | 83 (78, 88)       | 86 (78, 93)            | 88 (80, 96)       | 0.663              |
| Saturated fat (g/d)       | 28 (27, 29)       | 29 (27, 31)            | 28 (26, 30)       | 28 (25, 30)            | 29 (25, 32)       | 0.848              |
| Monounsaturated fat (g/d) | 30 (29, 31)       | 30 (28, 32)            | 29 (27, 31)       | 29 (27, 32)            | 31 (28, 34)       | 0.599              |
| Polyunsaturated fat (g/d) | 20 (19, 21)       | 20 (18, 21)            | 18 (17, 20)       | 20 (18, 22)            | 20 (18, 22)       | 0.141              |
| Cholesterol (mg/d)        | 296 (281, 311)    | 314 (289, 339)         | 307 (273, 340)    | 310 (281, 339)         | 321 (272, 370)    | 0.815              |
| Calcium (mg/d)            | 981 (945, 1017)   | 976 (931, 1022)        | 1042 (928, 1156)  | 979 (905, 1054)        | 922 (796, 1047)   | 0.722              |
| Potassium (mg/d)          | 2652 (2583, 2721) | 2591 (2463, 2720)      | 2477 (2354, 2600) | 2509 (2310, 2708)      | 2495 (2237, 2752) | 0.076              |
| Magnesium (mg/d)          | 312 (303, 321)    | 290 (276, 304)         | 278 (263, 294)    | 282 (258, 307)         | 268 (237, 299)    | <b>0.003</b>       |
| Sodium (mg/d)             | 3622 (3527, 3717) | 3764 (3589, 3940)      | 3680 (3459, 3901) | 3791 (3517, 4065)      | 3899 (3474, 4324) | 0.545              |

\*Values are means (95% confidence intervals)

**Supplemental Table 4. Absolute and energy-adjusted dietary intake by diabetes status in non-pregnant adults 20+ years old from NHANES 2013-2016 stratified by sex.\***

|                                     | Male              |                   |              | Female            |                   |                   |
|-------------------------------------|-------------------|-------------------|--------------|-------------------|-------------------|-------------------|
|                                     | No diabetes       | Diabetes          | P-value      | No diabetes       | Diabetes          | P-value           |
| <b>N (unweighted)</b>               | 1601              | 496               |              | 1751              | 451               |                   |
| <b>Absolute intake</b>              |                   |                   |              |                   |                   |                   |
| Energy (kcal/d)                     | 2508 (2447, 2569) | 2293 (2157, 2430) | <b>0.009</b> | 1872 (1818, 1926) | 1724 (1638, 1810) | <b>0.005</b>      |
| Protein (g/d)                       | 98 (95, 102)      | 93 (88, 98)       | 0.063        | 72 (70, 75)       | 66 (62, 71)       | <b>0.014</b>      |
| Total carbohydrates (g/d)           | 289 (281, 298)    | 259 (239, 278)    | <b>0.010</b> | 221 (215, 228)    | 206 (193, 218)    | <b>0.025</b>      |
| Sugar (g/d)                         | 123 (117, 130)    | 107 (94, 120)     | <b>0.041</b> | 98 (93, 103)      | 88 (79, 98)       | <b>0.047</b>      |
| Fiber (g/d)                         | 19 (18, 20)       | 18 (17, 20)       | 0.600        | 16 (15, 16)       | 14 (13, 15)       | <b>0.001</b>      |
| Fat (g/d)                           | 97 (93, 100)      | 93 (87, 99)       | 0.295        | 76 (73, 78)       | 70 (66, 73)       | <b>0.007</b>      |
| Saturated fat (g/d)                 | 32 (31, 34)       | 31 (29, 33)       | 0.165        | 24 (23, 25)       | 22 (21, 24)       | <b>0.021</b>      |
| Monounsaturated fat (g/d)           | 34 (33, 35)       | 33 (31, 35)       | 0.345        | 26 (25, 28)       | 24 (23, 26)       | <b>0.012</b>      |
| Polyunsaturated fat (g/d)           | 22 (21, 23)       | 21 (19, 23)       | 0.662        | 18 (17, 19)       | 17 (15, 18)       | <b>0.026</b>      |
| Cholesterol (mg/d)                  | 338 (325, 351)    | 344 (316, 372)    | 0.652        | 260 (245, 274)    | 254 (230, 279)    | 0.714             |
| Calcium (mg/d)                      | 1111 (1058, 1163) | 1049 (954, 1145)  | 0.209        | 847 (811, 884)    | 819 (747, 891)    | 0.473             |
| Potassium (mg/d)                    | 2960 (2874, 3046) | 2879 (2714, 3044) | 0.387        | 2353 (2278, 2429) | 2199 (2067, 2331) | <b>0.017</b>      |
| Magnesium (mg/d)                    | 346 (334, 358)    | 320 (301, 339)    | <b>0.028</b> | 272 (263, 281)    | 243 (229, 256)    | <b>&lt; 0.001</b> |
| Sodium (mg/d)                       | 4160 (4035, 4285) | 3996 (3744, 4247) | 0.239        | 3114 (3004, 3224) | 2975 (2786, 3163) | 0.195             |
| <b>Energy adjusted intake</b>       |                   |                   |              |                   |                   |                   |
| Protein (% kcal)                    | 16.1 (15.6, 16.6) | 16.7 (15.8, 17.5) | 0.247        | 16.0 (15.5, 16.4) | 15.8 (15.2, 16.4) | 0.646             |
| Total carbohydrates (% kcal)        | 46.4 (45.6, 47.1) | 45.7 (44.4, 46.9) | 0.307        | 47.7 (46.9, 48.5) | 48.0 (46.8, 49.3) | 0.618             |
| Sugar (% kcal)                      | 19.7 (18.8, 20.5) | 18.4 (16.9, 20.0) | 0.202        | 21.1 (20.4, 21.8) | 20.4 (18.9, 21.9) | 0.387             |
| Fiber (g / 2000 kcal)               | 15 (15, 16)       | 17 (15, 19)       | 0.060        | 17 (17, 18)       | 17 (16, 18)       | 0.927             |
| Fat (% kcal)                        | 34.4 (33.9, 35.0) | 35.9 (34.7, 37.1) | <b>0.027</b> | 35.6 (35.0, 36.2) | 35.7 (34.8, 36.6) | 0.844             |
| Saturated fat (% kcal)              | 11.4 (11.1, 11.6) | 11.7 (11.4, 12.1) | 0.055        | 11.4 (11.2, 11.7) | 11.5 (11.0, 12.1) | 0.708             |
| Monounsaturated fat (% kcal)        | 12.1 (11.9, 12.4) | 12.7 (12.2, 13.2) | 0.052        | 12.4 (12.2, 12.7) | 12.4 (12.0, 12.9) | 0.923             |
| Polyunsaturated fat (% kcal)        | 7.7 (7.5, 7.9)    | 8.2 (7.7, 8.6)    | 0.104        | 8.5 (8.2, 8.8)    | 8.4 (8.0, 8.8)    | 0.871             |
| Cholesterol (mg / 2000 kcal)        | 276 (266, 286)    | 310 (288, 332)    | <b>0.004</b> | 284 (270, 299)    | 300 (271, 329)    | 0.338             |
| Calcium (mg / 2000 kcal)            | 897 (866, 928)    | 921 (862, 980)    | 0.459        | 946 (906, 986)    | 1020 (934, 1105)  | 0.120             |
| Potassium (mg / 2000 kcal)          | 2443 (2387, 2499) | 2646 (2519, 2772) | <b>0.005</b> | 2628 (2557, 2698) | 2732 (2589, 2874) | 0.154             |
| Magnesium (mg / 2000 kcal)          | 283 (275, 291)    | 293 (275, 310)    | 0.297        | 304 (294, 314)    | 301 (288, 313)    | 0.645             |
| Sodium (mg / 2000 kcal)             | 3406 (3318, 3493) | 3579 (3425, 3733) | 0.091        | 3433 (3329, 3536) | 3515 (3379, 3651) | 0.382             |
| <b>Overall HEI-2015 Diet Score†</b> | 43.1 (42.2, 44.1) | 43.8 (42.1, 45.5) | 0.375        | 45.3 (44.4, 46.1) | 44.4 (42.4, 46.4) | 0.346             |

\*Values are means (95% confidence intervals) †Range = 0 (worst) to 100 (best)

Supplemental Table 5. Absolute dietary intake by diabetes status in non-pregnant adults 20+ years old from NHANES 2013-2016 stratified by age.\*

|                                     | 20-29                |                      |         | 30-49                |                      |              | 50-69                |                      |              | 70+                  |                      |              |
|-------------------------------------|----------------------|----------------------|---------|----------------------|----------------------|--------------|----------------------|----------------------|--------------|----------------------|----------------------|--------------|
|                                     | No diabetes          | Diabetes             | P-value | No diabetes          | Diabetes             | P-value      | No diabetes          | Diabetes             | P-value      | No diabetes          | Diabetes             | P-value      |
| <b>N (unweighted)</b>               | 627                  | 25                   |         | 1282                 | 161                  |              | 1033                 | 495                  |              | 410                  | 266                  |              |
| Energy (kcal/d)                     | 2222<br>(2133, 2310) | 2417<br>(1883, 2950) | 0.443   | 2279<br>(2202, 2357) | 2299<br>(2085, 2513) | 0.871        | 2142<br>(2072, 2211) | 2029<br>(1914, 2144) | 0.133        | 1765<br>(1682, 1849) | 1688<br>(1591, 1786) | 0.232        |
| Protein (g/d)                       | 88<br>(83, 93)       | 94<br>(71, 118)      | 0.565   | 90<br>(87, 93)       | 90<br>(79, 101)      | 0.995        | 82<br>(79, 85)       | 82<br>(77, 86)       | 0.937        | 67<br>(64, 71)       | 66<br>(62, 70)       | 0.676        |
| Total carbohydrates (g/d)           | 261<br>(249, 272)    | 282<br>(213, 351)    | 0.525   | 266<br>(256, 275)    | 266<br>(238, 295)    | 0.956        | 248<br>(238, 258)    | 233<br>(219, 247)    | 0.133        | 212<br>(201, 223)    | 196<br>(182, 211)    | 0.120        |
| Sugar (g/d)                         | 114<br>(106, 122)    | 140<br>(91, 189)     | 0.302   | 114<br>(108, 120)    | 118<br>(95, 140)     | 0.774        | 107<br>(100, 113)    | 96<br>(87, 105)      | 0.096        | 97<br>(90, 103)      | 79<br>(71, 87)       | <b>0.001</b> |
| Fiber (g/d)                         | 16<br>(15, 17)       | 14<br>(9, 19)        | 0.476   | 18<br>(17, 19)       | 17<br>(14, 19)       | 0.281        | 18<br>(17, 19)       | 17<br>(16, 18)       | 0.212        | 16<br>(15, 17)       | 15<br>(14, 16)       | 0.372        |
| Fat (g/d)                           | 86<br>(82, 91)       | 90<br>(63, 117)      | 0.775   | 89<br>(85, 93)       | 91<br>(81, 101)      | 0.665        | 86<br>(82, 90)       | 83<br>(77, 89)       | 0.340        | 71<br>(67, 75)       | 71<br>(66, 75)       | 0.776        |
| Saturated fat (g/d)                 | 29<br>(27, 30)       | 32<br>(21, 43)       | 0.508   | 29<br>(28, 31)       | 30<br>(27, 33)       | 0.784        | 28<br>(26, 29)       | 27<br>(25, 29)       | 0.625        | 23<br>(22, 25)       | 22<br>(21, 24)       | 0.421        |
| Monounsaturated fat (g/d)           | 30<br>(28, 31)       | 31<br>(21, 39)       | 0.983   | 31<br>(30, 32)       | 32<br>(28, 36)       | 0.792        | 31<br>(29, 32)       | 29<br>(27, 31)       | 0.271        | 25<br>(23, 27)       | 25<br>(23, 26)       | 0.753        |
| Polyunsaturated fat (g/d)           | 20<br>(19, 21)       | 18<br>(12, 24)       | 0.543   | 20<br>(19, 21)       | 21<br>(18, 24)       | 0.610        | 20<br>(19, 21)       | 19<br>(17, 21)       | 0.268        | 17<br>(15, 18)       | 17<br>(16, 19)       | 0.540        |
| Cholesterol (mg/d)                  | 297<br>(273, 320)    | 302<br>(234, 371)    | 0.871   | 311<br>(294, 329)    | 344<br>(298, 390)    | 0.188        | 295<br>(277, 313)    | 299<br>(265, 332)    | 0.851        | 246<br>(222, 271)    | 269<br>(244, 293)    | 0.223        |
| Calcium (mg/d)                      | 1031<br>(951, 1111)  | 1233<br>(881, 1585)  | 0.227   | 1022<br>(967, 1077)  | 1017<br>(881, 1154)  | 0.951        | 919<br>(870, 967)    | 971<br>(877, 1065)   | 0.277        | 826<br>(761, 891)    | 743<br>(669, 817)    | 0.094        |
| Potassium (mg/d)                    | 2458<br>(2319, 2598) | 2454<br>(1976, 2932) | 0.985   | 2710<br>(2616, 2805) | 2601<br>(2340, 2862) | 0.461        | 2739<br>(2644, 2833) | 2646<br>(2501, 2790) | 0.265        | 2479<br>(2372, 2586) | 2295<br>(2163, 2427) | <b>0.021</b> |
| Magnesium (mg/d)                    | 288<br>(271, 305)    | 284<br>(228, 340)    | 0.884   | 319<br>(307, 331)    | 302<br>(274, 331)    | 0.331        | 319<br>(303, 334)    | 292<br>(276, 308)    | <b>0.020</b> | 265<br>(252, 278)    | 244<br>(233, 254)    | <b>0.009</b> |
| Sodium (mg/d)                       | 3760<br>(3600, 3919) | 3638<br>(2647, 4629) | 0.794   | 3866<br>(3733, 3999) | 3931<br>(3410, 4451) | 0.811        | 3434<br>(3302, 3565) | 3544<br>(3331, 3757) | 0.376        | 2835<br>(2721, 2950) | 3013<br>(2756, 3270) | 0.188        |
| <b>Overall HEI-2015 Diet Score†</b> | 41.5<br>(40.2, 42.8) | 40.4<br>(37.0, 43.7) | 0.544   | 43.5<br>(42.4, 44.7) | 40.0<br>(37.8, 42.2) | <b>0.009</b> | 46.3<br>(44.7, 47.8) | 44.8<br>(42.7, 46.8) | 0.147        | 46.8<br>(45.2, 48.4) | 46.6<br>(44.9, 48.3) | 0.850        |

\*Values are means (95% confidence intervals) †Range = 0 (worst) to 100 (best)

Supplemental Table 6. Energy-adjusted dietary intake by diabetes status in non-pregnant adults 20+ years old from NHANES 2013-2016 stratified by age.\*

|                                 | 20-29                |                      |         | 30-49                |                      |              | 50-69                |                      |              | 70+                  |                      |              |
|---------------------------------|----------------------|----------------------|---------|----------------------|----------------------|--------------|----------------------|----------------------|--------------|----------------------|----------------------|--------------|
|                                 | No diabetes          | Diabetes             | P-value | No diabetes          | Diabetes             | P-value      | No diabetes          | Diabetes             | P-value      | No diabetes          | Diabetes             | P-value      |
| <b>N (unweighted)</b>           | 627                  | 25                   |         | 1282                 | 161                  |              | 1033                 | 495                  |              | 410                  | 266                  |              |
| Protein<br>(% kcal)             | 16.1<br>(15.3, 16.8) | 16.4<br>(13.7, 19.0) | 0.845   | 16.2<br>(15.8, 16.6) | 15.8<br>(14.6, 16.9) | 0.454        | 15.8<br>(15.3, 16.4) | 16.4<br>(15.9, 17.0) | 0.182        | 15.8<br>(15.3, 16.4) | 16.2<br>(15.3, 17)   | 0.473        |
| Total carbohydrates<br>(% kcal) | 47.3<br>(46.2, 48.4) | 45.8<br>(39.8, 51.8) | 0.594   | 47.1<br>(46.3, 48)   | 46.9<br>(44.6, 49.1) | 0.828        | 46.5<br>(45.3, 47.8) | 46.8<br>(45.3, 48.3) | 0.728        | 47.9<br>(46.5, 49.2) | 46.9<br>(45.6, 48.3) | 0.349        |
| Sugar<br>(% kcal)               | 20.7<br>(19.4, 21.9) | 21.4<br>(14.9, 27.9) | 0.825   | 20.3<br>(19.5, 21.1) | 20.6<br>(17.3, 23.9) | 0.864        | 20.0<br>(19.1, 21.0) | 19.1<br>(17.6, 20.6) | 0.232        | 21.5<br>(20.5, 22.5) | 18.8<br>(17.5, 20.1) | <b>0.002</b> |
| Fiber<br>(g / 2000 kcal)        | 15<br>(14, 15)       | 12<br>(8, 17)        | 0.317   | 16<br>(15, 17)       | 15<br>(13, 17)       | 0.150        | 17<br>(16, 18)       | 18<br>(16, 19)       | 0.445        | 18<br>(17, 19)       | 18<br>(17, 19)       | 0.868        |
| Fat<br>(% kcal)                 | 34.6<br>(33.9, 35.3) | 33.2<br>(27.8, 38.6) | 0.596   | 34.5<br>(33.7, 35.2) | 35.3<br>(33.7, 36.9) | 0.327        | 35.8<br>(34.9, 36.7) | 35.7<br>(34.4, 37.0) | 0.901        | 36.0<br>(34.8, 37.2) | 36.9<br>(35.6, 38.1) | 0.357        |
| Saturated fat<br>(% kcal)       | 11.5<br>(11.1, 11.8) | 11.6<br>(9.2, 14.1)  | 0.882   | 11.3<br>(10.9, 11.6) | 11.6<br>(10.8, 12.4) | 0.422        | 11.4<br>(11.1, 11.7) | 11.6<br>(11.1, 12.1) | 0.476        | 11.8<br>(11.2, 12.3) | 11.8<br>(11.1, 12.4) | 0.988        |
| Monounsaturated fat<br>(% kcal) | 11.9<br>(11.6, 12.2) | 11.0<br>(9.0, 12.9)  | 0.363   | 12.1<br>(11.8, 12.4) | 12.2<br>(11.5, 12.9) | 0.768        | 12.7<br>(12.4, 13.1) | 12.6<br>(12.0, 13.3) | 0.776        | 12.6<br>(12.0, 13.2) | 12.9<br>(12.4, 13.4) | 0.485        |
| Polyunsaturated fat<br>(% kcal) | 8.0<br>(7.6, 8.3)    | 6.7<br>(5.5, 8.0)    | 0.069   | 7.9<br>(7.6, 8.1)    | 8.1<br>(7.6, 8.7)    | 0.404        | 8.4<br>(8.0, 8.7)    | 8.2<br>(7.7, 8.7)    | 0.369        | 8.3<br>(7.8, 8.9)    | 8.9<br>(8.3, 9.5)    | 0.171        |
| Cholesterol<br>(mg / 2000 kcal) | 272<br>(250, 294)    | 253<br>(200, 306)    | 0.461   | 277<br>(263, 290)    | 307<br>(276, 338)    | 0.081        | 285<br>(267, 303)    | 299<br>(266, 333)    | 0.490        | 300<br>(265, 335)    | 325<br>(293, 358)    | 0.306        |
| Calcium<br>(mg / 2000 kcal)     | 952<br>(897, 1006)   | 1074<br>(857, 1290)  | 0.288   | 921<br>(882, 960)    | 921<br>(841, 1000)   | 0.989        | 891<br>(853, 930)    | 1005<br>(929, 1081)  | <b>0.004</b> | 967<br>(906, 1029)   | 906<br>(828, 985)    | 0.247        |
| Potassium<br>(mg / 2000 kcal)   | 2293<br>(2206, 2380) | 2218<br>(1809, 2627) | 0.721   | 2479<br>(2413, 2544) | 2317<br>(2189, 2445) | <b>0.022</b> | 2668<br>(2586, 2751) | 2807<br>(2664, 2949) | 0.105        | 2928<br>(2808, 3047) | 2795<br>(2656, 2933) | 0.134        |
| Magnesium<br>(mg / 2000 kcal)   | 271<br>(259, 283)    | 258<br>(219, 297)    | 0.559   | 293<br>(285, 301)    | 270<br>(256, 284)    | <b>0.006</b> | 306<br>(293, 319)    | 308<br>(292, 324)    | 0.840        | 311<br>(299, 323)    | 298<br>(287, 310)    | 0.140        |
| Sodium<br>(mg / 2000 kcal)      | 3444<br>(3349, 3539) | 3069<br>(2607, 3532) | 0.119   | 3504<br>(3387, 3620) | 3469<br>(3237, 3702) | 0.787        | 3326<br>(3220, 3431) | 3592<br>(3449, 3735) | <b>0.017</b> | 3322<br>(3193, 3451) | 3587<br>(3393, 3781) | <b>0.029</b> |

\*Values are means (95% confidence intervals)

Supplemental Table 7. Absolute dietary intake by diabetes status in non-pregnant adults 20+ years old from NHANES 2013-2016 stratified by race.\*

|                                     | Non-Hispanic White   |                      |              | Non-Hispanic Black   |                      |              | Mexican American     |                      |              | Other                |                      |              |
|-------------------------------------|----------------------|----------------------|--------------|----------------------|----------------------|--------------|----------------------|----------------------|--------------|----------------------|----------------------|--------------|
|                                     | No diabetes          | Diabetes             | P-value      |
| <b>N (unweighted)</b>               | 1405                 | 344                  |              | 618                  | 210                  |              | 470                  | 170                  |              | 859                  | 223                  |              |
| Energy (kcal/d)                     | 2183<br>(2126, 2239) | 2026<br>(1913, 2139) | <b>0.037</b> | 2137<br>(2037, 2236) | 1905<br>(1722, 2088) | <b>0.005</b> | 2362<br>(2236, 2488) | 2178<br>(2025, 2331) | 0.075        | 2083<br>(2001, 2165) | 1985<br>(1855, 2115) | 0.216        |
| Protein (g/d)                       | 84<br>(81, 86)       | 80<br>(76, 85)       | 0.195        | 81<br>(77, 86)       | 74<br>(66, 81)       | 0.074        | 96<br>(89, 102)      | 86<br>(80, 92)       | 0.051        | 87<br>(83, 91)       | 83<br>(77, 88)       | 0.190        |
| Total carbohydrates (g/d)           | 252<br>(244, 261)    | 233<br>(216, 250)    | 0.084        | 249<br>(237, 262)    | 217<br>(196, 239)    | <b>0.002</b> | 280<br>(266, 295)    | 258<br>(239, 276)    | 0.069        | 252<br>(242, 262)    | 232<br>(215, 249)    | 0.061        |
| Sugar (g/d)                         | 112<br>(105, 118)    | 101<br>(89, 113)     | 0.164        | 111<br>(104, 118)    | 94<br>(78, 109)      | <b>0.022</b> | 114<br>(106, 122)    | 102<br>(92, 112)     | 0.096        | 100<br>(95, 106)     | 84<br>(75, 94)       | <b>0.004</b> |
| Fiber (g/d)                         | 17<br>(16, 18)       | 16<br>(15, 18)       | 0.274        | 14<br>(13, 15)       | 14<br>(13, 15)       | 0.979        | 22<br>(20, 23)       | 19<br>(17, 22)       | 0.063        | 18<br>(17, 19)       | 17<br>(16, 19)       | 0.468        |
| Fat (g/d)                           | 87<br>(84, 90)       | 83<br>(77, 88)       | 0.105        | 84<br>(80, 88)       | 78<br>(69, 87)       | 0.181        | 91<br>(85, 97)       | 87<br>(80, 94)       | 0.366        | 77<br>(73, 81)       | 79<br>(72, 86)       | 0.673        |
| Saturated fat (g/d)                 | 29<br>(28, 30)       | 28<br>(26, 29)       | 0.135        | 26<br>(24, 27)       | 24<br>(21, 26)       | 0.127        | 30<br>(27, 32)       | 28<br>(26, 31)       | 0.456        | 24<br>(23, 26)       | 25<br>(22, 27)       | 0.872        |
| Monounsaturated fat (g/d)           | 30<br>(29, 32)       | 29<br>(27, 31)       | 0.095        | 30<br>(28, 31)       | 28<br>(25, 31)       | 0.173        | 32<br>(30, 34)       | 30<br>(28, 33)       | 0.414        | 27<br>(26, 29)       | 29<br>(26, 31)       | 0.425        |
| Polyunsaturated fat (g/d)           | 20<br>(19, 21)       | 19<br>(17, 20)       | 0.234        | 20<br>(19, 21)       | 20<br>(17, 23)       | 0.755        | 21<br>(19, 22)       | 20<br>(18, 22)       | 0.564        | 18<br>(17, 19)       | 18<br>(16, 20)       | 0.985        |
| Cholesterol (mg/d)                  | 288<br>(274, 303)    | 288<br>(258, 317)    | 0.966        | 311<br>(287, 335)    | 319<br>(282, 356)    | 0.685        | 353<br>(317, 389)    | 391<br>(337, 444)    | 0.230        | 296<br>(280, 312)    | 285<br>(250, 320)    | 0.564        |
| Calcium (mg/d)                      | 1012<br>(967, 1058)  | 983<br>(882, 1085)   | 0.576        | 772<br>(733, 811)    | 737<br>(670, 803)    | 0.306        | 1069<br>(1000, 1138) | 1020<br>(937, 1104)  | 0.394        | 894<br>(844, 945)    | 856<br>(772, 941)    | 0.430        |
| Potassium (mg/d)                    | 2683<br>(2597, 2768) | 2631<br>(2489, 2773) | 0.542        | 2323<br>(2238, 2409) | 2229<br>(2024, 2433) | 0.290        | 2794<br>(2660, 2929) | 2514<br>(2330, 2698) | <b>0.038</b> | 2628<br>(2531, 2725) | 2495<br>(2346, 2645) | 0.098        |
| Magnesium (mg/d)                    | 310<br>(298, 322)    | 283<br>(267, 299)    | <b>0.012</b> | 264<br>(252, 275)    | 256<br>(232, 280)    | 0.526        | 335<br>(316, 354)    | 295<br>(276, 313)    | <b>0.005</b> | 312<br>(298, 326)    | 300<br>(276, 324)    | 0.386        |
| Sodium (mg/d)                       | 3605<br>(3495, 3714) | 3497<br>(3273, 3722) | 0.400        | 3480<br>(3301, 3659) | 3221<br>(2910, 3533) | 0.098        | 3915<br>(3707, 4123) | 3595<br>(3277, 3912) | 0.111        | 3603<br>(3445, 3762) | 3752<br>(3410, 4094) | 0.382        |
| <b>Overall HEI-2015 Diet Score†</b> | 44.0<br>(42.8, 45.2) | 43.8<br>(42.1, 45.6) | 0.800        | 41.7<br>(40.5, 42.9) | 44.2<br>(42.2, 46.2) | <b>0.027</b> | 44.1<br>(42.4, 45.8) | 43.3<br>(41.3, 45.4) | 0.567        | 47.2<br>(46.2, 48.2) | 46.0<br>(43.2, 48.8) | 0.362        |

\*Values are means (95% confidence intervals) †Range = 0 (worst) to 100 (best)

**Supplemental Table 8. Energy-adjusted dietary intake by diabetes status in non-pregnant adults 20+ years old from NHANES 2013-2016 stratified by race.\***

|                                 | Non-Hispanic White   |                      |              | Non-Hispanic Black   |                      |              | Mexican American     |                      |              | Other                |                      |              |
|---------------------------------|----------------------|----------------------|--------------|----------------------|----------------------|--------------|----------------------|----------------------|--------------|----------------------|----------------------|--------------|
|                                 | No diabetes          | Diabetes             | P-value      |
| <b>N (unweighted)</b>           | 1405                 | 344                  |              | 618                  | 210                  |              | 470                  | 170                  |              | 859                  | 223                  |              |
| Protein<br>(% kcal)             | 15.8<br>(15.3, 16.3) | 16.2<br>(15.4, 16.9) | 0.399        | 15.5<br>(14.9, 16.1) | 15.9<br>(15, 16.9)   | 0.413        | 16.6<br>(16, 17.2)   | 16.2<br>(15.5, 17)   | 0.424        | 17.2<br>(16.8, 17.7) | 16.9<br>(16, 17.8)   | 0.493        |
| Total carbohydrates<br>(% kcal) | 46.4<br>(45.5, 47.3) | 46.5<br>(45, 48)     | 0.899        | 47.4<br>(46.3, 48.4) | 46<br>(44.5, 47.5)   | 0.137        | 48.3<br>(47, 49.6)   | 48.3<br>(46.9, 49.8) | 0.988        | 49.1<br>(48, 50.1)   | 48.1<br>(46.2, 49.9) | 0.304        |
| Sugar<br>(% kcal)               | 20.6<br>(19.7, 21.5) | 19.9<br>(18.1, 21.7) | 0.487        | 21<br>(20, 22.1)     | 19.1<br>(17.3, 20.9) | 0.092        | 19.8<br>(18.8, 20.8) | 19<br>(17.6, 20.4)   | 0.418        | 19.4<br>(18.5, 20.3) | 17.3<br>(15.8, 18.7) | <b>0.011</b> |
| Fiber<br>(g / 2000 kcal)        | 16<br>(15, 17)       | 17<br>(15, 18)       | 0.324        | 14<br>(13, 14)       | 16<br>(14, 17)       | <b>0.021</b> | 19<br>(18, 20)       | 19<br>(17, 21)       | 0.894        | 18<br>(17, 19)       | 19<br>(17, 20)       | 0.192        |
| Fat<br>(% kcal)                 | 35.8<br>(35.1, 36.4) | 36<br>(34.7, 37.3)   | 0.673        | 34.7<br>(33.6, 35.7) | 36.6<br>(35.1, 38.2) | <b>0.008</b> | 34.2<br>(33.6, 34.8) | 35.1<br>(34, 36.1)   | 0.152        | 32.6<br>(31.8, 33.3) | 34.5<br>(32.9, 36)   | <b>0.018</b> |
| Saturated fat<br>(% kcal)       | 11.8<br>(11.6, 12.1) | 12<br>(11.5, 12.5)   | 0.553        | 10.7<br>(10.2, 11.1) | 11.1<br>(10.6, 11.7) | 0.084        | 11<br>(10.6, 11.3)   | 11.2<br>(10.7, 11.8) | 0.446        | 10.1<br>(9.8, 10.5)  | 10.7<br>(9.9, 11.5)  | 0.095        |
| Monounsaturated fat<br>(% kcal) | 12.5<br>(12.2, 12.7) | 12.5<br>(11.9, 13)   | 0.981        | 12.4<br>(12, 12.8)   | 13.3<br>(12.7, 13.9) | <b>0.005</b> | 11.9<br>(11.6, 12.2) | 12.3<br>(11.8, 12.7) | 0.187        | 11.5<br>(11.2, 11.8) | 12.4<br>(11.7, 13.1) | <b>0.035</b> |
| Polyunsaturated fat<br>(% kcal) | 8.2<br>(7.9, 8.4)    | 8.2<br>(7.7, 8.7)    | 0.878        | 8.3<br>(7.9, 8.7)    | 9<br>(8.4, 9.7)      | <b>0.042</b> | 7.9<br>(7.6, 8.1)    | 8.2<br>(7.9, 8.4)    | 0.195        | 7.8<br>(7.5, 8)      | 8.1<br>(7.5, 8.6)    | 0.290        |
| Cholesterol<br>(mg / 2000 kcal) | 273<br>(261, 286)    | 296<br>(266, 326)    | 0.169        | 293<br>(274, 312)    | 339<br>(316, 362)    | <b>0.002</b> | 310<br>(291, 328)    | 356<br>(322, 389)    | <b>0.026</b> | 286<br>(273, 299)    | 279<br>(253, 305)    | 0.627        |
| Calcium<br>(mg / 2000 kcal)     | 958<br>(919, 996)    | 1012<br>(930, 1094)  | 0.208        | 763<br>(737, 789)    | 818<br>(729, 908)    | 0.247        | 933<br>(899, 967)    | 978<br>(900, 1056)   | 0.173        | 874<br>(842, 907)    | 897<br>(830, 964)    | 0.551        |
| Potassium<br>(mg / 2000 kcal)   | 2568<br>(2495, 2640) | 2760<br>(2636, 2885) | <b>0.019</b> | 2272<br>(2185, 2360) | 2466<br>(2253, 2678) | 0.066        | 2480<br>(2379, 2581) | 2488<br>(2312, 2663) | 0.938        | 2639<br>(2587, 2690) | 2685<br>(2523, 2847) | 0.557        |
| Magnesium<br>(mg / 2000 kcal)   | 295<br>(285, 305)    | 294<br>(280, 309)    | 0.936        | 262<br>(252, 272)    | 286<br>(259, 313)    | 0.109        | 296<br>(284, 307)    | 291<br>(274, 309)    | 0.668        | 312<br>(302, 322)    | 322<br>(297, 348)    | 0.423        |
| Sodium<br>(mg / 2000 kcal)      | 3409<br>(3317, 3501) | 3525<br>(3360, 3690) | 0.260        | 3306<br>(3208, 3404) | 3458<br>(3294, 3622) | 0.122        | 3357<br>(3283, 3431) | 3351<br>(3222, 3479) | 0.931        | 3589<br>(3473, 3705) | 3895<br>(3630, 4160) | <b>0.036</b> |

\*Values are means (95% confidence intervals)



Supplemental Table 9. Dietary intake by time of diabetes diagnosis in non-pregnant adults 20+ years old from NHANES 2013-2016 crude and adjusted.\*

|                                     | Crude              |                   |                  | Model 1†           |                   |              | Model 2‡           |                   |              |
|-------------------------------------|--------------------|-------------------|------------------|--------------------|-------------------|--------------|--------------------|-------------------|--------------|
|                                     | No prior diagnosis | Prior diagnosis   | P-Values         | No prior diagnosis | Prior diagnosis   | P-value      | No prior diagnosis | Prior diagnosis   | P-value      |
| <b>N (unweighted)</b>               | 204                | 743               |                  | 204                | 743               |              | 204                | 743               |              |
| <b>Absolute intake</b>              |                    |                   |                  |                    |                   |              |                    |                   |              |
| Energy (kcal/d)                     | 2095 (1884, 2305)  | 1994 (1892, 2096) | 0.412            | 2029 (1856, 2202)  | 2022 (1923, 2121) | 0.948        | 1989 (1790, 2188)  | 2039 (1929, 2149) | 0.674        |
| Protein (g/d)                       | 85 (74, 96)        | 79 (75, 82)       | 0.306            | 83 (73, 92)        | 80 (76, 84)       | 0.601        | 81 (71, 92)        | 80 (75, 85)       | 0.837        |
| Total carbohydrates (g/d)           | 229 (205, 252)     | 234 (220, 248)    | 0.641            | 221 (201, 241)     | 238 (224, 251)    | 0.135        | 213 (191, 235)     | 240 (226, 254)    | <b>0.039</b> |
| Sugar (g/d)                         | 102 (89, 115)      | 97 (87, 106)      | 0.393            | 98 (87, 109)       | 98 (89, 108)      | 0.943        | 93 (80, 105)       | 100 (90, 110)     | 0.354        |
| Fiber (g/d)                         | 15 (14, 16)        | 17 (15, 18)       | <b>0.050</b>     | 15 (14, 16)        | 17 (16, 18)       | <b>0.016</b> | 15 (13, 16)        | 17 (16, 18)       | <b>0.020</b> |
| Fat (g/d)                           | 84 (75, 92)        | 81 (76, 86)       | 0.665            | 81 (74, 88)        | 82 (77, 87)       | 0.816        | 80 (73, 88)        | 83 (77, 88)       | 0.617        |
| Saturated fat (g/d)                 | 29 (26, 32)        | 26 (24, 28)       | 0.174            | 28 (25, 31)        | 26 (25, 28)       | 0.409        | 28 (25, 31)        | 26 (25, 28)       | 0.476        |
| Monounsaturated fat (g/d)           | 29 (26, 32)        | 29 (27, 30)       | 0.822            | 28 (26, 31)        | 29 (27, 31)       | 0.705        | 28 (25, 31)        | 29 (27, 31)       | 0.519        |
| Polyunsaturated fat (g/d)           | 18 (16, 19)        | 19 (18, 21)       | 0.081            | 17 (16, 18)        | 20 (18, 21)       | <b>0.019</b> | 17 (15, 18)        | 20 (18, 21)       | <b>0.004</b> |
| Cholesterol (mg/d)                  | 311 (257, 365)     | 298 (273, 322)    | 0.654            | 307 (259, 355)     | 300 (274, 326)    | 0.794        | 318 (269, 367)     | 298 (270, 326)    | 0.495        |
| Calcium (mg/d)                      | 1080 (879, 1280)   | 892 (828, 957)    | 0.079            | 1039 (852, 1226)   | 907 (851, 963)    | 0.178        | 1014 (826, 1202)   | 914 (858, 970)    | 0.315        |
| Potassium (mg/d)                    | 2641 (2438, 2845)  | 2521 (2393, 2650) | 0.337            | 2574 (2400, 2749)  | 2541 (2414, 2668) | 0.763        | 2497 (2266, 2729)  | 2562 (2420, 2703) | 0.652        |
| Magnesium (mg/d)                    | 290 (269, 312)     | 280 (267, 294)    | 0.426            | 284 (266, 301)     | 283 (270, 296)    | 0.928        | 274 (250, 298)     | 286 (272, 300)    | 0.364        |
| Sodium (mg/d)                       | 3504 (3076, 3932)  | 3502 (3294, 3710) | 0.994            | 3403 (3038, 3768)  | 3548 (3329, 3766) | 0.536        | 3355 (2940, 3769)  | 3552 (3311, 3792) | 0.450        |
| <b>Energy adjusted intake</b>       |                    |                   |                  |                    |                   |              |                    |                   |              |
| Protein (% kcal)                    | 16.1 (14.9, 17.2)  | 16.3 (15.7, 16.9) | 0.660            | 16.1 (15.0, 17.1)  | 16.3 (15.7, 16.9) | 0.696        | 16.3 (15.1, 17.4)  | 16.2 (15.6, 16.8) | 0.943        |
| Total carbohydrates (% kcal)        | 44.6 (43.2, 46.0)  | 47.5 (46.5, 48.5) | <b>&lt;0.001</b> | 44.7 (43.4, 46.0)  | 47.5 (46.4, 48.6) | <b>0.001</b> | 44.0 (42.3, 45.6)  | 47.6 (46.4, 48.9) | <b>0.001</b> |
| Sugar (% kcal)                      | 20.2 (18.8, 21.7)  | 19.1 (17.6, 20.6) | 0.230            | 20.1 (18.7, 21.4)  | 19.2 (17.7, 20.7) | 0.383        | 19.3 (17.7, 20.8)  | 19.4 (17.7, 21.0) | 0.937        |
| Fiber (g / 2000 kcal)               | 15 (14, 17)        | 18 (16, 19)       | <b>0.003</b>     | 16 (14, 17)        | 18 (16, 19)       | <b>0.019</b> | 16 (14, 17)        | 17 (16, 19)       | 0.085        |
| Fat (% kcal)                        | 35.1 (33.6, 36.6)  | 36.0 (35.1, 36.9) | 0.268            | 35.2 (33.6, 36.7)  | 36.0 (35.0, 36.9) | 0.370        | 35.4 (33.3, 37.4)  | 35.9 (34.8, 37.0) | 0.628        |
| Saturated fat (% kcal)              | 12.0 (11.1, 12.8)  | 11.5 (11.2, 11.9) | 0.339            | 11.9 (11.1, 12.7)  | 11.5 (11.2, 11.9) | 0.461        | 12.0 (11.1, 13.0)  | 11.5 (11.1, 11.9) | 0.295        |
| Monounsaturated fat (% kcal)        | 12.1 (11.6, 12.6)  | 12.7 (12.3, 13.1) | <b>0.025</b>     | 12.2 (11.7, 12.7)  | 12.7 (12.3, 13.1) | 0.106        | 12.3 (11.6, 12.9)  | 12.6 (12.2, 13.1) | 0.322        |
| Polyunsaturated fat (% kcal)        | 7.7 (7.2, 8.2)     | 8.5 (8.1, 8.8)    | <b>0.004</b>     | 7.8 (7.3, 8.3)     | 8.4 (8.1, 8.8)    | <b>0.023</b> | 7.7 (7.0, 8.3)     | 8.5 (8.1, 8.9)    | <b>0.042</b> |
| Cholesterol (mg / 2000 kcal)        | 304 (263, 345)     | 305 (284, 327)    | 0.957            | 309 (266, 351)     | 303 (281, 325)    | 0.815        | 333 (286, 380)     | 295 (275, 315)    | 0.149        |
| Calcium (mg / 2000 kcal)            | 1024 (890, 1158)   | 951 (895, 1006)   | 0.293            | 1012 (877, 1147)   | 953 (897, 1010)   | 0.411        | 1018 (868, 1168)   | 953 (896, 1010)   | 0.406        |
| Potassium (mg / 2000 kcal)          | 2688 (2515, 2860)  | 2687 (2591, 2784) | 0.996            | 2701 (2523, 2878)  | 2673 (2573, 2773) | 0.754        | 2712 (2495, 2929)  | 2658 (2561, 2755) | 0.620        |
| Magnesium (mg / 2000 kcal)          | 292 (272, 312)     | 298 (286, 309)    | 0.586            | 295 (276, 315)     | 296 (284, 309)    | 0.927        | 292 (270, 314)     | 297 (285, 309)    | 0.675        |
| Sodium (mg / 2000 kcal)             | 3329 (3131, 3527)  | 3619 (3476, 3763) | <b>0.022</b>     | 3341 (3145, 3536)  | 3616 (3471, 3760) | <b>0.034</b> | 3377 (3157, 3597)  | 3578 (3427, 3729) | 0.156        |
| <b>Overall HEI-2015 Diet Score‡</b> | 43.6 (41.4, 45.8)  | 44.3 (43.0, 45.5) | 0.489            | 44.1 (42.1, 46.1)  | 44.0 (42.8, 45.3) | 0.945        | 43.2 (41.1, 45.3)  | 44.4 (43.1, 45.7) | 0.266        |

\*Values are means (95% confidence intervals), †Adjusted for age, race, and sex, Model 1 + education, duration of diabetes, and access to healthcare ‡Range = 0 (worst) to 100 (best)
